# Supplementary material
Source: PubMed Central journal article supplement (PMC3397833)

## SUPPLEMENTARY DATA

### Myosin Regulatory Light Chain Diphosphorylation Slows Relaxation of Arterial Smooth Muscle

Cindy Sutherland and Michael P. Walsh

#### FIGURE LEGENDS

**Supplementary FIGURE S1.** Effect of exogenous calmodulin and MLCK on LC<sub>20</sub> phosphorylation in Triton-skinned rat caudal arterial smooth muscle. Triton-skinned rat caudal arterial smooth muscle strips were incubated for 15 min in pCa 9 solution in the absence or presence of exogenous calmodulin (CaM) (1.8  $\mu$ M) and/or MLCK (10 or 50 nM). [Ca<sup>2+</sup>] was then increased to pCa 4.5 under otherwise identical conditions and, after steady-state force was achieved (10 and 20 min), tissues were harvested for Phos-tag SDS-PAGE and western blotting with anti-pan LC<sub>20</sub>. A control experiment in which tissue was treated with microcystin at pCa 9 was included to indicate the positions of unphosphorylated (0P), mono- (1P) and diphosphorylated LC<sub>20</sub> (2P) bands. Phosphorylation levels were quantified and the results are shown in Supplementary Table 1.

**Supplementary FIGURE S2.** Identification of thiophosphorylated forms of LC<sub>20</sub> using phosphospecific antibodies. Triton-skinned rat caudal arterial smooth muscle strips were treated as shown in Fig. 8A and harvested at selected times for Phos-tag SDS-PAGE and western blotting with anti-pan LC<sub>20</sub>, anti-pS19-LC<sub>20</sub>, anti-pT18-LC<sub>20</sub> and anti-pT18,pS19-LC<sub>20</sub>. A control experiment (lane 1) in which tissue was treated with microcystin at pCa 9 was included to indicate the positions of unphosphorylated (0P), mono- (1P) and diphosphorylated LC<sub>20</sub> (2P) bands. Tissue incubated at pCa 9 (lane 2) is also included as a control. Numbers 3 - 6 indicate tissues harvested at the times indicated in Fig. 8A.

**Supplementary FIGURE S3.** ILK does not use ATP $\gamma$ S as a substrate. Triton-skinned rat caudal arterial smooth muscle strips were treated as shown in **A**. Tissues were harvested at the indicated times for Phos-tag SDS-PAGE and western blotting with anti-pan LC<sub>20</sub> (**B**). Numbers 1 (pCa 9) and 2 (pCa 4.5 + ATP $\gamma$ S) correspond to the times indicated in Fig. 8A, and numbers 3 and 4 to the times indicated in panel **A** of this figure (i.e. tissue treated with ATP $\gamma$ S + microcystin at pCa 9 and following washout at pCa 9, respectively).

**Supplementary FIGURE S4.** Contraction of Triton-skinned rat caudal arterial smooth muscle induced by Ca<sup>2+</sup> or okadaic acid in the absence of Ca<sup>2+</sup>. Following control Ca<sup>2+</sup>-induced contraction-relaxation cycles, Triton-skinned rat caudal arterial smooth muscle strips were treated with okadaic acid (OA; 20  $\mu$ M) at pCa 9 (**A**) or with Ca<sup>2+</sup> (pCa 4.5) (**B**). Relaxation followed washout of OA or removal of Ca<sup>2+</sup>, respectively.

**Supplementary FIGURE S5.** Dephosphorylation of MYPT1 following washout of okadaic acid. Tissues were treated as in Fig. S4A and harvested at the indicated times as follows: under relaxed conditions at pCa 9 (pCa 9); at the peak of pCa 4.5-induced contraction (pCa 4.5); at the plateau of okadaic acid-induced contraction at pCa 9 (100% Force) and during the relaxation following washout of okadaic acid corresponding to force levels of 90, 80, 70, 60, 50 and 25% and at complete relaxation (0% Force). Tissue samples were subjected to SDS-PAGE and western blotting with anti-pT697-MYPT1 or anti-pT855-MYPT1. Blots were also probed with anti-actin (shown beneath the corresponding phosphospecific antibody blots). Identical results were obtained in 5 independent experiments.

**Supplementary Table 1. Effect of exogenous calmodulin and MLCK on LC<sub>20</sub> phosphorylation in Triton-skinned rat caudal arterial smooth muscle<sup>1</sup>**

| Conditions                         | % total LC <sub>20</sub> |      |      |
|------------------------------------|--------------------------|------|------|
|                                    | 0P                       | 1P   | 2P   |
| pCa 4.5, 10 min                    | 34.7                     | 65.3 | 0    |
| pCa 4.5, 20 min                    | 22.6                     | 76.0 | 1.4  |
| pCa 4.5, CaM, 10 min               | 16.7                     | 80.1 | 3.2  |
| pCa 4.5, CaM, 20 min               | 14.7                     | 81.3 | 4.0  |
| pCa 4.5, CaM, MLCK (10 nM), 10 min | 22.3                     | 73.5 | 4.2  |
| pCa 4.5, CaM, MLCK (10 nM), 20 min | 17.8                     | 77.7 | 4.5  |
| pCa 4.5, CaM, MLCK (50 nM), 10 min | 20.7                     | 75.1 | 4.2  |
| pCa 4.5, CaM, MLCK (50 nM), 20 min | 24.0                     | 70.3 | 5.7  |
| MC, pCa 9                          | 16.8                     | 26.4 | 56.8 |

<sup>1</sup>These data were calculated from the western blot in Supplementary Fig. S1.

# Figure S1

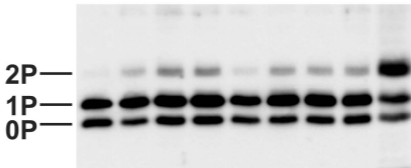

|             |     |     |     |     |     |     |     |     |    |
|-------------|-----|-----|-----|-----|-----|-----|-----|-----|----|
| pCa:        | 4.5 | 4.5 | 4.5 | 4.5 | 4.5 | 4.5 | 4.5 | 4.5 | 9  |
| CaM:        | -   | +   | +   | +   | -   | +   | +   | +   | -  |
| MLCK (nM):  | 0   | 0   | 10  | 50  | 0   | 0   | 10  | 50  | 0  |
| MC:         | -   | -   | -   | -   | -   | -   | -   | -   | +  |
| time (min): | 10  | 10  | 10  | 10  | 20  | 20  | 20  | 20  | 60 |

# Figure S2

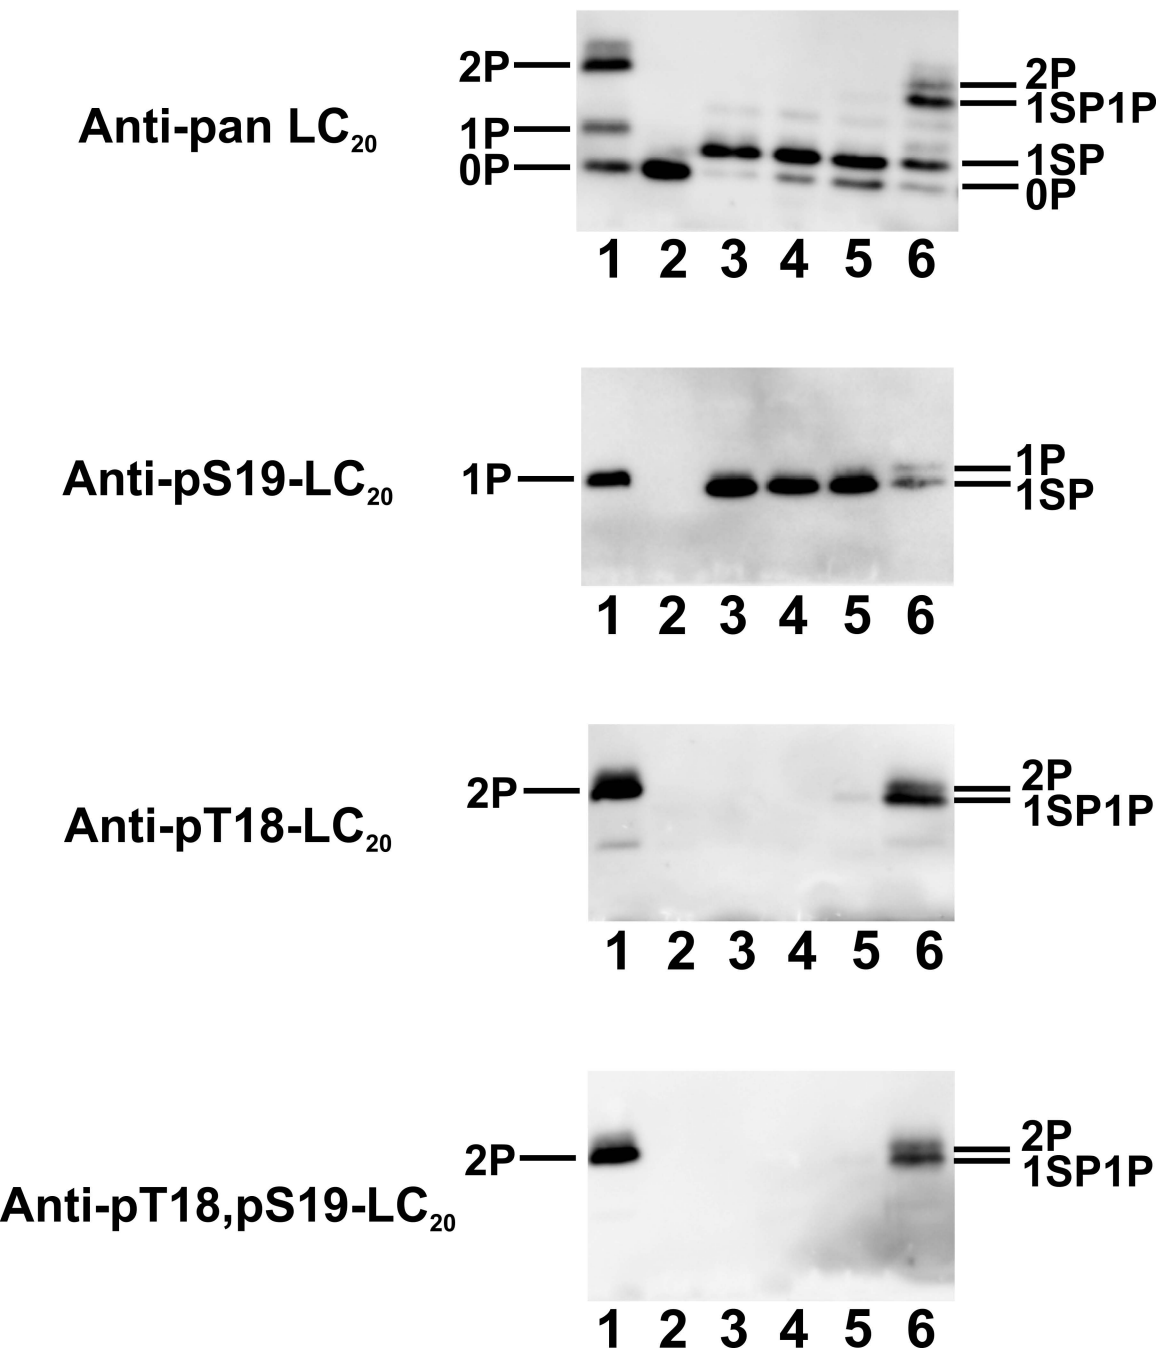

# Figure S3

## A

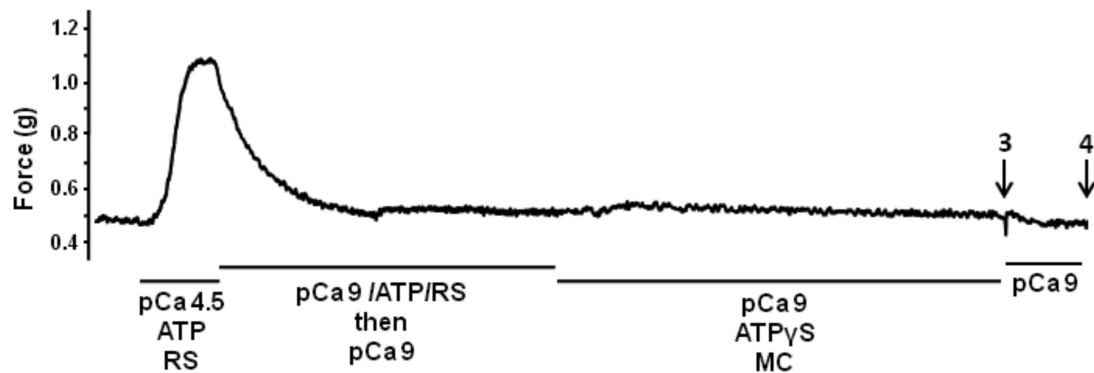

## B

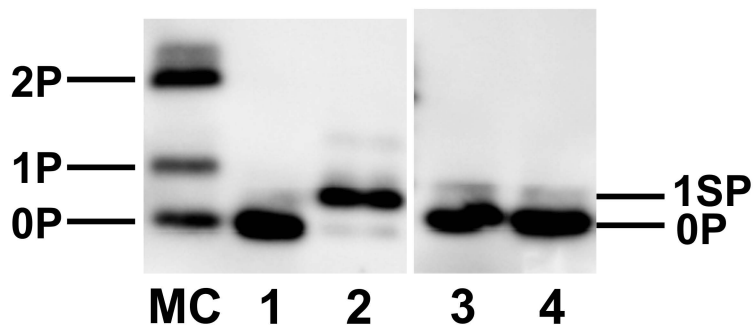

Figure S4

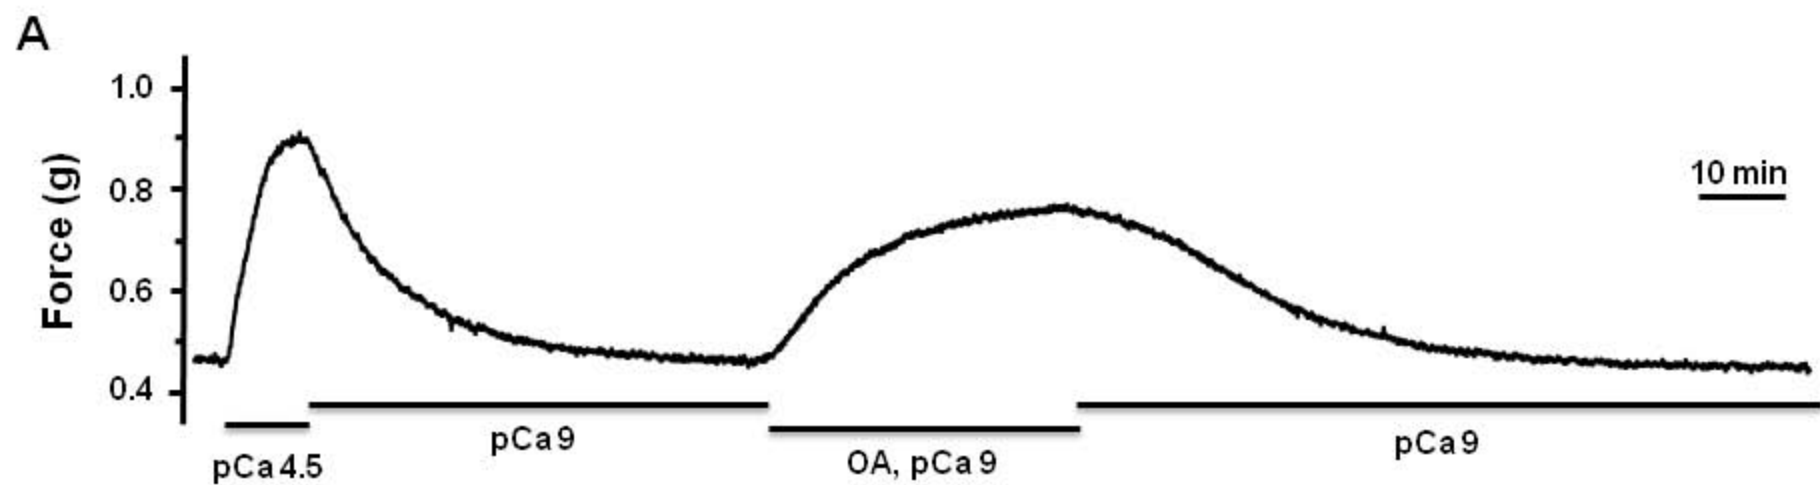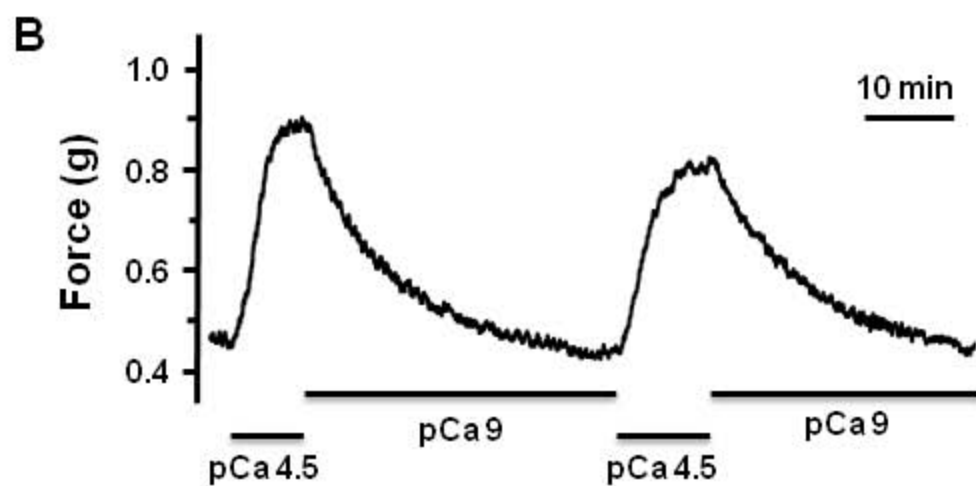

Supplement: supp_M112.371609_JBC2012371609_Supp_final.pdf [file supp_M112.371609_JBC2012371609_Supp_final.pdf]
